# Supplementary material
Source: PubMed Central journal article supplement (PMC6459219)
Supplement: jamaneurol-76-405-s001.pdf [file jamaneurol-76-405-s001.pdf]

## Supplementary Online Content

Bourcier R, Goyal M, Liebeskind DS, et al. Association of time from stroke onset to groin puncture with quality of reperfusion after mechanical thrombectomy. *JAMA Neurol.* Published online January 22, 2019. doi:10.1001/jamaneurol.2018.4510

**eAppendix.** The HERMES Investigator List

**eTable 1.** Thrombolysis In Cerebral Infarction (TICI) Scale

**eTable 2.** Clot Burden Score by Time Interval of Onset to Arterial Puncture

This supplementary material has been provided by the authors to give readers additional information about their work.

**eTable 1. Thrombolysis In Cerebral Infarction (TICI) Scale**

| <b>Score TICI</b> | <b>Angiographic patterns</b>                                                                                                                                                                                         |
|-------------------|----------------------------------------------------------------------------------------------------------------------------------------------------------------------------------------------------------------------|
| 0                 | No perfusion or anterograde flow beyond site of occlusion                                                                                                                                                            |
| 1                 | Penetration but not perfusion. Contrast penetration exists past the initial obstruction but with minimal filling of the normal territory                                                                             |
| 2                 | Incomplete perfusion wherein the contrast passes the occlusion and opacifies the distal arterial bed but rate of entry or clearance from the bed is slower or incomplete when compared with non-involved territories |
| 2A                | Some perfusion with distal branch filling of <50% of territory visualized                                                                                                                                            |
| 2B                | Substantial perfusion with distal branch filling of $\geq$ 50% of territory visualized                                                                                                                               |
| 2C                | Near-complete perfusion except for slow flow in a few distal cortical vessels or presence of small distal cortical emboli                                                                                            |
| 3                 | Complete perfusion with normal filling of all distal branches                                                                                                                                                        |

**eTable 2: Clot burden score by time interval of onset to arterial puncture.**

| Clot burden score by onset to arterial puncture (min) |     |      |         |        |     |     |         |
|-------------------------------------------------------|-----|------|---------|--------|-----|-----|---------|
| Onset to arterial puncture                            | N   | Mean | Std Dev | Median | Q1  | Q3  | p-value |
| 0-179 min                                             | 163 | 4.0  | 2.7     | 4.0    | 1.0 | 6.0 | 0.610   |
| 180-239 min                                           | 209 | 4.3  | 2.4     | 4.0    | 4.0 | 6.0 |         |
| 240-299 min                                           | 185 | 4.2  | 2.3     | 4.0    | 4.0 | 6.0 |         |
| 300-359 min                                           | 104 | 3.8  | 2.6     | 4.0    | 1.0 | 6.0 |         |
| 360+ min                                              | 157 | 4.1  | 2.4     | 4.0    | 3.0 | 6.0 |         |

Table 2 displays summary statistics for clot burden scores, grouped by time from onset to arterial puncture. The resulting p-value evaluates the association between score and time, which was found to be nonsignificant.

## eAppendix. HERMES Investigator List

The HERMES collaboration includes the collaborators from five endovascular acute ischemic stroke trials. The links to the author and collaborator lists for each of these trials is given below. In addition, the list of collaborators is appended to the following pages.

|                                                                                                                                                                                                   |                                                                                                                                                                                                   |
|---------------------------------------------------------------------------------------------------------------------------------------------------------------------------------------------------|---------------------------------------------------------------------------------------------------------------------------------------------------------------------------------------------------|
| MRCLEAN                                                                                                                                                                                           | trial                                                                                                                                                                                             |
| <a href="http://www.nejm.org/doi/suppl/10.1056/NEJMoa1411587/suppl_file/nejmoa1411587_appendix.pdf">http://www.nejm.org/doi/suppl/10.1056/NEJMoa1411587/suppl_file/nejmoa1411587_appendix.pdf</a> | ESCAPE                                                                                                                                                                                            |
| trial                                                                                                                                                                                             | <a href="http://www.nejm.org/doi/suppl/10.1056/NEJMoa1414905/suppl_file/nejmoa1414905_appendix.pdf">http://www.nejm.org/doi/suppl/10.1056/NEJMoa1414905/suppl_file/nejmoa1414905_appendix.pdf</a> |
| EXTEND-IA                                                                                                                                                                                         | trial                                                                                                                                                                                             |
| <a href="http://www.nejm.org/doi/suppl/10.1056/NEJMoa1414792/suppl_file/nejmoa1414792_appendix.pdf">http://www.nejm.org/doi/suppl/10.1056/NEJMoa1414792/suppl_file/nejmoa1414792_appendix.pdf</a> | SWIFT-                                                                                                                                                                                            |
| PRIME trial                                                                                                                                                                                       | <a href="http://www.nejm.org/doi/suppl/10.1056/NEJMoa1415061/suppl_file/nejmoa1415061_appendix.pdf">http://www.nejm.org/doi/suppl/10.1056/NEJMoa1415061/suppl_file/nejmoa1415061_appendix.pdf</a> |
| REVASCAT                                                                                                                                                                                          | trial                                                                                                                                                                                             |
| <a href="http://www.nejm.org/doi/suppl/10.1056/NEJMoa1503780/suppl_file/nejmoa1503780_appendix.pdf">http://www.nejm.org/doi/suppl/10.1056/NEJMoa1503780/suppl_file/nejmoa1503780_appendix.pdf</a> |                                                                                                                                                                                                   |

## List of MR CLEAN investigators and affiliations

Olvert A. Berkhemer, M.D.,\*<sup>1,2</sup>Puck S.S. Fransen, M.D.,\*<sup>2,3</sup>Debbie Beumer, M.D.,\*<sup>2,4</sup>Lucie A. van den Berg, M.D.,<sup>5</sup> Hester F. Lingsma, M.D., Ph.D.,<sup>7</sup> Albert J. Yoo, M.D.,<sup>8</sup> Wouter J. Schonewille, M.D.,<sup>9</sup> Jan Albert Vos, M.D., Ph.D.,<sup>10</sup> Paul J. Nederkoorn, M.D., Ph.D.,<sup>5</sup> Marieke J.H. Wermer, M.D., Ph.D.,<sup>11</sup> Marianne A.A. van Walderveen, M.D., Ph.D.,<sup>12</sup> Julie Staals, M.D., Ph.D.,<sup>4</sup> Jeannette Hofmeijer, M.D., Ph.D.,<sup>13</sup> Jacques A. van Oostayen, M.D., Ph.D.,<sup>14</sup> Geert J. Lycklama à Nijeholt, M.D., Ph.D.,<sup>15</sup> Jelis Boiten, M.D., Ph.D.,<sup>16</sup> Patrick A. Brouwer, M.D.,<sup>3</sup> Bart J. Emmer, M.D., Ph.D.,<sup>3</sup> Sebastiaan F. de Bruijn, M.D., Ph.D.,<sup>17</sup> Lukas C. van Dijk, M.D.,<sup>18</sup> L. Jaap Kappelle, M.D., Ph.D.,<sup>19</sup> Rob H. Lo, M.D.,<sup>20</sup> Ewoud J. van Dijk, M.D., Ph.D.,<sup>21</sup> Joost de Vries, M.D., Ph.D.,<sup>22</sup> Paul L.M. de Kort, M.D., Ph.D.,<sup>23</sup> Willem Jan J. van Rooij, M.D., Ph.D.,<sup>24</sup> Jan S.P. vanden Berg, M.D., Ph.D.,<sup>25</sup> Boudewijn A.A.M. van Hasselt, M.D.,<sup>26</sup> Leo A.M. Aerden, M.D., Ph.D.,<sup>27</sup> René J. Dallinga, M.D.,<sup>28</sup> Marieke C. Visser, M.D., Ph.D.,<sup>29</sup> Joseph C.J. Bot, M.D., Ph.D.,<sup>30</sup> Patrick C. Vroomen, M.D., Ph.D.,<sup>31</sup> Omid Eshghi, M.D.,<sup>32</sup> Tobien H.C.M.L. Schreuder, M.D.,<sup>33</sup> Roel J.J. Heijboer, M.D.,<sup>34</sup> Koos Keizer, M.D., Ph.D.,<sup>35</sup> Alexander V. Tielbeek, M.D., Ph.D.,<sup>36</sup> Heleen M. den Hertog, M.D., Ph.D.,<sup>37</sup> Dick G. Gerrits, M.D.,<sup>38</sup> Renske M. van den Berg#Vos, M.D., Ph.D.,<sup>39</sup> Giorgos B. Karas, M.D.,<sup>40</sup> Ewout W. Steyerberg, M.D., Ph.D.,<sup>7</sup> H. Zwenneke Flach, M.D.,<sup>26</sup> Henk A. Marquering Ph.D.,<sup>41,1</sup> Marieke E.S. Sprengers, M.D., Ph.D.,<sup>1</sup> Sjoerd F.M. Jenniskens, M.D., Ph.D.,<sup>42</sup> Ludo F.M. Beenen, M.D.,<sup>1</sup> René van den Berg, M.D., Ph.D.,<sup>1</sup> Peter J. Koudstaal, M.D., Ph.D.,<sup>2</sup> Wim H. van Zwam, M.D., Ph.D.,<sup>#,6</sup> Yvo B.W.E.M. Roos, M.D., Ph.D.,<sup>#,5</sup> Aad van der Lugt, M.D., Ph.D.,<sup>#,3</sup> Robert J. van Oostenbrugge, M.D., Ph.D.,<sup>#,4</sup> Charles B.L.M. Majoie, M.D., Ph.D.,<sup>#,1</sup> and Diederik W.J. Dippel, M.D., Ph.D.<sup>#,2</sup>

\* Berkhemer, Fransen and Beumer contributed equally.

# van Zwam, Roos, van der Lugt, van Oostenbrugge, Majoie and Dippel contributed equally.

1 Department of Radiology, Academic Medical Center Amsterdam, the Netherlands; 2 Department of Neurology, Erasmus MC University Medical Center Rotterdam, the Netherlands; 3 Department of Radiology, Erasmus MC University Medical Center Rotterdam, the Netherlands; 4 Department of Neurology, Maastricht University Medical Center and Cardiovascular Research Institute Maastricht (CARIM), the Netherlands; 5 Department of Neurology, Academic Medical Center Amsterdam, the Netherlands; 6 Department of Radiology, Maastricht University Medical Center, the Netherlands; 7 Department of Public Health, Erasmus MC University Medical Center Rotterdam, the Netherlands; 8 Department of Radiology, Massachusetts General Hospital, Boston, United States of America; 9

Department of Neurology, Sint Antonius Hospital, Nieuwegein, the Netherlands; 10 Department of Radiology, Sint Antonius Hospital, Nieuwegein, the Netherlands; 11 Department of Neurology, Leiden University Medical Center, the Netherlands; 12 Department of Radiology, Leiden University Medical Center, the Netherlands; 13 Department of Neurology, Rijnstate Hospital, Arnhem, the Netherlands; 14 Department of Radiology, Rijnstate Hospital, Arnhem, the Netherlands; 15 Department of Radiology, MC Haaglanden, the Hague, the Netherlands; 16 Department of Neurology, MC Haaglanden, the Hague, the Netherlands; 17 Department of Neurology, HAGA Hospital, the Hague, the Netherlands; 18 Department of Radiology, HAGA Hospital, the Hague, the Netherlands; 19 Department of Neurology, University Medical Center Utrecht, the Netherlands; 20 Department of Radiology, University Medical Center Utrecht, the Netherlands; 21 Department of Neurology, Radboud University Medical Center, Nijmegen, the Netherlands; 22 Department of Neurosurgery, Radboud University Medical Center, Nijmegen, the Netherlands; 23 Department of Neurology, Sint Elisabeth Hospital, Tilburg, the Netherlands; 24 Department of Radiology, Sint Elisabeth Hospital, Tilburg, the Netherlands; 25 Department of Neurology, Isala Klinieken, Zwolle, the Netherlands; 26 Department of Radiology, Isala Klinieken, Zwolle, the Netherlands; 27 Department of Neurology, Reinier de Graaf Gasthuis, Delft, the Netherlands; 28 Department of Radiology, Reinier de Graaf Gasthuis, Delft, the Netherlands; 29 Department of Neurology, VU Medical Center, Amsterdam, the Netherlands; 30 Department of Radiology, VU Medical Center, Amsterdam, the Netherlands; 31 Department of Neurology, University Medical Center Groningen, the Netherlands; 32 Department of Radiology, University Medical Center Groningen, the Netherlands; 33 Department of Neurology, Atrium Medical Center, Heerlen, the Netherlands; 34 Department of Radiology, Atrium Medical Center, Heerlen, the Netherlands; 35 Department of Neurology, Catharina Hospital, Eindhoven, the Netherlands; 36 Department of Radiology, Catharina Hospital, Eindhoven, the Netherlands; 37 Department of Neurology, Medical Spectrum Twente, Enschede, the Netherlands; 38 Department of Radiology, Medical Spectrum Twente, Enschede, the Netherlands; 39 Department of Neurology, Sint Lucas Andreas Hospital, Amsterdam, the Netherlands; 40 Department of Radiology, Sint Lucas Andreas Hospital, Amsterdam, the Netherlands; 41 Department of Biomedical Engineering and Physics, Academic Medical Center Amsterdam, the Netherlands; 42 Department of Radiology, Radboud University Medical Center, Nijmegen, the Netherlands

## Acknowledgements

The MR CLEAN trial was funded by the Dutch Heart Foundation and through unrestricted grants from AngioCare BV, Covidien/EV3®, MEDAC GmbH/LAMEPRO and Penumbra Inc.

We thank the following persons for their help and advice during the conduct of MR CLEAN:

### Data monitoring and safety board:

Chair: Martin M. Brown, National Hospital for Neurology & Neurosurgery, London, UK. Member: Thomas Liebig, Med. Fakultät, Univ Köln, Germany, Independent Statistician: Theo Stijnen, Leiden University Medical Center, Leiden, the Netherlands

### Advisory board:

Tommy Andersson, neuro interventionist, Karolinska University Hospital, Stockholm, Sweden, Heinrich Mattle, neurologist, University hospital, Bern, Switzerland, Nils Wahlgren, neurologist, Karolinska Hospital, Stockholm, Sweden.

### Research nurses / local trial coordinators:

Esther van der Heijden, Naziha Ghannouti; Erasmus MC University Medical Center Rotterdam, the Netherlands. Nadine Fleitour, Imke Hooijenga; Academic Medical Center Amsterdam, the Netherlands. Corina Puppels, Wilma Pellikaan; Sint Antonius Hospital, Nieuwegein, the Netherlands. Annet Geerling; Radboud University Nijmegen Medical Center, the Netherlands. Annemieke Lindl#Velema; Maastricht University Medical Center, the Netherlands. Gina van Vemde; Isala Klinieken, Zwolle, The Netherlands. Ans de Ridder, Paut Greebe, University Medical Center Utrecht, the Netherlands. José de Bont# Stikkelbroeck, Sint Elisabeth Hospital, Tilburg, the Netherlands. Joke de Meris, MC Haaglanden, the Hague, the Netherlands. Kirsten Janssen, Leiden University Medical Center, the Netherlands. Willy Struijk, HAGA Hospital, the Hague, the Netherlands.

### PhD / Medical students:

Silvan Licher, Nikki Boodt, Adriaan Ros, Esmee Venema, Ilse Slokkers, Raymie#Jayce Ganpat, Maxim Mulder, Nawid Saiedie, Alis Heshmatollah, Stefanie Schipperen, Stefan Vinken, Tiemen van Boxtel, Jeroen Koets; Erasmus MC University Medical Center Rotterdam, the Netherlands.

Merel Boers, Emilie Santos, Jordi Borst, Ivo Jansen, Manon Kappelhof, Marit Lucas, Ralph Geuskens, Renan Sales Barros, Roeland Dobbe, Marloes Csizmadia; Academic Medical Center Amsterdam, the Netherlands.



## **Acknowledgements: Sites and Investigators**

### **The ESCAPE Trial Investigators are:**

**University of Calgary Coordinating Center:** MD Hill (co-PI), M Goyal (co-PI), AM Demchuk (co-PI), BK Menon, M Eesa, KJ Ryckborst, MR Wright, NR Kamal, L Andersen, PA Randhawa, T Stewart, S Patil, P Minhas, M Almekhlafi, S Mishra, F Clement, T Sajobi (biostatistician)

**Trial Steering Committee:** MD Hill, M Goyal, AM Demchuk, BK Menon, A Shuaib, WJ Montanera, D Roy, FL Silver, TG Jovin, DF Frei, B Sapkota, JL Rempel, J Thornton, D Williams, D Tampieri, AY Poppe, D Dowlatsahi, KJ Ryckborst, NR Kamal

**Neurovascular Committee:** M Goyal (chairperson), JH Wong, AP Mitha, S Subramaniam, G Hull

**Clinical Research Unit:** MW Lowerison, T Sajobi

**Calgary Image Processing and Analysis Centre:** M Salluzzi

**Contracts and Finances:** MR Wright, M Maxwell, S Lacusta

**Site Monitors:** E Drupals, K Armitage

**Safety Review Committee:** PA Barber, EE Smith, WF Morrish and SB Coutts.

**Data Safety Monitoring Board:** C Derdeyn (chairperson), B Demaerschalk, D Yavagal, R Martin (biostatistician), R Brant (independent blinded statistician), Y Yu (independent blinded statistician)

**CT Core Lab:** RA Willinsky, WJ Montanera

**Angiogram Core Lab:** D Roy, A Weill

### **Enrolling Sites (ordered by number of subjects enrolled): Foothills**

#### **Medical Centre, University of Calgary, Calgary, AB (64) Site PIs:**

MD Hill; M Goyal

Primary Study Coordinators: KJ Ryckborst, C Kenney, H Aram, T Stewart

Other Site Investigators: AM Demchuk, SB Coutts, BK Menon, S Subramaniam, PA Barber, EE Smith, PK Stys, TW Watson, G Klein, D Pearson, P Couillard, A Trivedi, D Singh, E Klourfeld, Y Yu, O Imoukhuede, D Nikneshan, S Blayney, R Reddy, P Choi, M Horton, T Musuka, V Dubuc, TS Field, J Desai, S Adatia, A Alseraya, V Nambiar, S Mishra, M Almekhlafi, R van Dijk, JH Wong, AP Mitha, WF Morrish, M Eesa, NJ Newcommon

#### **University of Alberta Hospital, Edmonton, AB (35)**

Site PIs: A Shuaib; JL Rempel

Primary Study Coordinators: B Schwindt

Other Site Investigators: K Butcher, T Jeerakathil, B Buck, K Khan, SS Naik, DJ Emery, RJ Owen, TB Kotylak, RA Ashforth, TA Yeo, D McNally, M Siddiqui, M Saqqur, D

Hussain, H Kalashyan, A Manosalva, M Kate, L Gioia, S Hasan, A Mohammad, M Muratoglu

**Beaumont Hospital and Royal College of Surgeons in Ireland, Dublin, IE (34)**

Site PIs: D Williams; J Thornton

Primary Study Coordinators: A Cullen

Other Site Investigators: P Brennan, A O Hare, S Looby, D Hyland, A Cullen, S Duff, M Mc Cusker, B Hallinan, S Lee, J Mc Cormack, A Moore, M O'Connor, C Donegan, L Brewer, A Martin, S Murphy, K O'Rourke, S Smyth, P Kelly, T Lynch, T Daly, P O'Brien, A O'Driscoll, M Martin, T Daly, R Collins, T Coughlan, D McCabe, S Murphy, D O'Neill, M Mulroy, O Lynch, T Walsh, M O'Donnell, T Galvin, J Harbison, P McElwaine, K Mulpeter, C McLoughlin, M Reardon, E Harkin, E Dolan, M Watts, N Cunningham, C Fallon, S Gallagher, P Cotter, M Crowe, R Doyle, I Noone

**CHUM-Hopital Notre Dame, Montreal, QC (30)**

Site PIs: AY Poppe; D Roy

Primary Study Coordinators: M Lapierre, VA Coté

Other Site Investigators: S Lanthier, C Odier, A Durocher, J Raymond, A Weill, N Daneault and Y Deschaintre

**UPMC Medical Centre, Pittsburgh, PA (24)**

Site PIs: T Jovin; B Jankowitz

Primary Study Coordinators: L Baxendell, L Massaro, C Jackson-Graves, S Decesare, P Porter, K Armbruster, A Adams, J Billigan, J Oakley

Other Site Investigators: A Ducruet, A Jadhav, D-V Giurgiutiu, A Aghaebrahim, V Reddy, M Hammer, M Starr, V Totoraitis, L Wechsler, S Streib, S Rangaraju, D Campbell, M Rocha, D Gulati

**University Health Network, University of Toronto, Toronto ON (22)**

Site PIs: FL Silver; T Krings

Primary Study Coordinators: L Kalman, A Cayley, J Williams, T Stewart, and R Wiegner

Other Site Investigators: LK Casaubon, C Jaigobin, JM del Campo, . Elamin, JD Schaafsma, RA Willinsky, R Agid, R Farb, K ter Brugge

**Erlanger Hospital, Chattanooga, TN (21)**

Site PIs: BL Sapkota; BW Baxter

Primary Study Coordinators: K Barton, A Knox, A Porter

Other Site Investigators: A Sirelkhatim, T Devlin, C Dellinger, N Pitiyanuvath, J Patterson, J Nichols, S Quarfordt, J Calvert, H Hawk,

**Swedish Medical Center- Colorado Neurological Institute, Denver, CO (16)**

Site PIs: C Fanale; DF Frei

Primary Study Coordinators: A Bitner, A Novak,

Other Site Investigators: D Huddle, R Bellon, D Loy, J Wagner, I Chang, E Lampe B

Spencer, R Pratt, R Bartt, S Shine, G Dooley, T Nguyen, M Whaley, K McCarthy

**Montreal Neurological Institute, McGill University, Montreal, QC (12)**

Site PIs: J Teitelbaum ; D Tampieri

Primary Study Coordinators: W Poon, N Campbell

Other Site Investigators: M Cortes

**Ottawa Hospital, University of Ottawa, Ottawa, ON (10)**

Site PIs: D Dowlatshahi; C Lum

Primary Study Coordinators: R Shamloul, S Robert

Other Site Investigators: G Stotts, M Shamy, N Steffenhagen, D Blacquiére, M Hogan, M

AlHazzaa, G Basir, H Lesiuk, D Iancu, M Santos

**Abington Memorial Hospital, Philadelphia, PA (8)**

Site PIs: H Choe; DC Weisman

Primary Study Coordinators: K Jonczak, A Blue-Schaller

Other Site Investigators: Q Shah, L MacKenzie, B Klein, K Kulandaivel, O Kozak, DJ

Gzesh, LJ Harris, JS Khoury

**London Health Science Centre, Western University, London, ON (8)**

Site PIs: J Mandzia; D Pelz

Primary Study Coordinators: S Crann, L Fleming, K Hesser, B Beauchamp, B Amato-Marzialli

Other Site Investigators: M Boulton, P Lopez- Ojeda, M Sharma, S Lownie, R Chan

**University of Toronto-Sunnybrook Health Sciences Centre, Toronto, ON (7)**

Site PIs: R Swartz; P Howard Primary

Study Coordinators: D Golob

Other Site Investigators: D Gladstone, K Boyle, M Boulos, J Hopyan, V Yang, L Da Costa

**Medical University of South Carolina, Charleston, SC (6)**

Site PIs: CA Holmstedt; AS Turk

Primary Study Coordinators: R Navarro

Other Site Investigators: E Jauch, S Ozark, R. Turner

**Queen Elizabeth II Health Science Centre, Dalhousie University, Halifax, NS (5)**

Site PIs: S. Phillips; J. Shankar Primary

Study Coordinators: J. Jarrett

Other Site Investigators: G Gubitz, W Maloney; R Vandorpe, M Schmidt, J Heidenreich

**Royal University Hospital, University of Saskatchewan, Saskatoon, SK (4)**

Site PIs: G Hunter; M Kelly

Primary Study Coordinators: R Whelan

Other Site Investigators: L Peeling

**Royal Victoria Hospital, Belfast, UK (4)**

Site PI: PA Burns

Primary Study Coordinators: A Hunter

Other Site Investigators: I Wiggam, E Kerr, M Watt, A Fulton, P Gordon, I Rennie, P Flynn, G Smyth, S O'Leary

**Temple University, Philadelphia, PA (2)**

Site PIs: N Gentile; G Linares

Primary Study Coordinators: P McNelis

Other Site Investigators: K Erkmen, P Katz, A Azizi, M Weaver, C Jungreis, S Faro, P Shah, H Reimer, V Kalugdan.

**St. Michael's Hospital, University of Toronto, Toronto, ON (1)**

Site PIs: G Saposnik; A Bharatha

Primary Study Coordinators: Y Li, P Kostyrko, M Santos

Other Site Investigators: T Marotta, W Montanera, D Sarma, D Selchen, J Spears

**Yonsei University Severance Hospital, Seoul, KR (1)**

Site PI: JH Heo;

Primary Study Coordinators: K Jeong

Other Site Investigators: DJ Kim, BM Kim, YD Kim, D Song, K-J Lee, J Yoo

**Samsung Medical Center, Seoul, KR (1)**

Site PI: OY Bang

Primary Study Coordinators: S Rho, J Lee

Other Site Investigators: P Jeon, KH Kim, J Cha, SJ Kim, S Ryoo, MJ Lee

**Keimyung University, Dongsan Medical Center, Daegu, KR (1)**

Site PIs: S-I Sohn; C-H Kim

Primary Study Coordinators: H-G Ryu

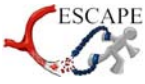

Other Site Investigators: J-H Hong, H-W Chang, C-Y Lee

**Nonenrolling Sites:**

**Inha University Hospital, Incheon, Korea**

Site PI: J Rha

## **1) EXTEND-IA Trial: LIST OF INVESTIGATORS AND ADMINISTRATIVE STAFF**

**EXECUTIVE COMMITTEE:** S.M. Davis and G.A. Donnan (Co-chairs),  
B.C.V. Campbell (Co-principal Investigator and Medical Co-ordinator),  
P.J. Mitchell (Co-principal Investigator and Chair of Neurointervention),  
L. Churilov (Statistician).

### **ENROLLING CLINICAL CENTERS (number recruited):**

Australia: **Royal Melbourne Hospital** (21) B.C.V. Campbell, P.J. Mitchell, S.M. Davis, B. Yan, R.J. Dowling, N. Yassi, T.J. Oxley, T.Y. Wu, G. Silver, A. McDonald, R. McCoy; **Royal Adelaide Hospital** (12) T.J. Kleinig, R. Scroop; **Austin Hospital** (10) H.M. Dewey, M. Simpson, M. Brooks, B. Coulton; **Royal North Shore Hospital** (6) M. Krause, T.J. Harrington, B. Steinfort, K. Faulder, M. Priglinger, S. Day; **Monash Medical Centre** (4) T. Phan, W. Chong, M. Holt, R.V. Chandra, H. Ma, D. Young, K Wong; **Western Hospital** (4) T. Wijeratne, H. Tu, E. Mackay, S. Celestino; **Box Hill Hospital** (3) C.F. Bladin, P.S. Loh, A. Gilligan, Z. Ross, S. Coote, T Frost; **John Hunter Hospital** (3) M.W. Parsons, F. Miteff, C.R. Levi, T. Ang, N. Spratt, L. Kaauwai; **Gold Coast University Hospital** (3) M. Badve, H. Rice, L. de Villiers. New Zealand: **Auckland City Hospital** (4) P.A. Barber, B. McGuinness, A. Hope, M. Moriarty, P. Bennett.

### **NON ENROLLING SITES:**

Royal Brisbane and Women's Hospital - Andrew Wong, Alan Coulthard; Flinders Medical Centre - Andrew Lee; Queen Elizabeth Hospital - Jim Jannes; Lyell McEwin Hospital - Deborah Field.

### **ROYAL MELBOURNE HOSPITAL CLINICAL COORDINATING AND IMAGE**

**ANALYSIS CENTER:** B.C.V. Campbell, P.J. Mitchell, G. Sharma, S. Salinas

**INDEPENDENT MEDICAL MONITORS:** Neuroscience Trials Australia (Heidelberg, Victoria) E. Cowley and R. McCoy

**DATA AND SAFETY MONITORING BOARD:** B Snow (Chair), J Kolbe, R Stark, J King, R Macdonnell, J Attia, C D'Este (Independent Statistician).

## List of SWIFT PRIME Investigators and Study Personnel

---

### Executive Committee

Jeffrey L. Saver, MD (Global Principal Investigator), Mayank Goyal, MD (Global Imaging and Workflow Principal Investigator), Hans-Christoph Diener, MD (EU Principal Investigator), Elad I. Levy, MD (US Interventional Principal Investigator), Alain Bonafé, MD (EU Interventional Principal Investigator), Vitor Mendes Pereira, MD (EU Interventional Principal Investigator), Reza Jahan, MD (Interventional Advisor)

### Steering Committee

Gregory W. Albers, MD (Global Penumbra Imaging Investigator), Christophe Cognard, MD, David J. Cohen, MD, Werner Hacke, MD, Olav Jansen, MD, Tudor G. Jovin, MD, Heinrich P. Mattle, MD, Raul G. Nogueira, MD, Adnan H. Siddiqui, MD, Dileep R. Yavagal, MD

### Data Safety and Monitoring Committee

Rüdiger von Kummer, MD (Chair), Wade Smith, MD, Francis Turjman, MD, Scott Hamilton, PhD, Richard Chiacchierini, PhD

### Clinical Events Committee

Arun Amar, MD (Chair), Nerses Sanossian, MD, Yince Loh, MD

### Core Laboratory

iSchemaView and Bioclinica

### Enrolling Sites (in descending order by number of subjects enrolled):

**Chattanooga Center for Neurologic Research / Erlanger Hospital**—T. Devlin (PI), B. Baxter, H. Hawk, B. Sapkota, S. Quarfordt, A. Sirelkhatim, C. Dellinger, K. Barton; **University of Pittsburgh Medical Center**—VK. Reddy (PI), TG. Jovin, A. Ducruet, A. Jadhav, A. Horev, D. V. Giurgutiu, V. Totoraitis, M. Hammer, B. Jankowitz, L. Wechsler, M. Rocha, D. Gulati, D. Campbell, M. Star, L. Baxendell, J. Oakley; **University of Buffalo Neurosurgery / Buffalo General Hospital**—AH. Siddiqui (PI), LN. Hopkins, E. Levy, K.

Snyder, R. Sawyer, S. Hall; **CHU Montpellier** □ **Hôpital Gui de Chauliac**—A. Bonafé (PI), V. Costalat,  
C. Riquelme, P.



Machi, E. Omer, C. Arquizan, I. Mourand, M. Charif, X. Ayrignac, N. Menjot de Champfleury, N. Leboucq, G. Gascou, M. Moynier; **Klinikum der Johann Wolfgang Goethe Universität – Frankfurt** – R. du Mesnil de Rochemont (PI), O. Singer, J. Berkefeld, C. Foerch, M. Lorenz, W. Pfeilschifer, E. Hattingen, M. Wagner, S. J. You, S. Lescher, H. Braun; **Emory University / Grady Medical Center** – R. G. Nogueira (PI), S. Dehkharghani, S. R. Belagaje, A. Anderson, A. Lima, M. Obideen, D. Haussen, R. Dharia, M. Frankel, V. Patel, K. Owada, A. Saad, L. Amerson, C. Horn, S. Doppelheuer, K. Schindler; **Rush University Medical Center** – D. K. Lopes (PI), M. Chen, R. Mofakhar, C. Anton, M. Smreczak; **West Virginia University Hospital** – J. S. Carpenter (PI), S. Boo, A. Rai, T. Roberts, A. Tarabishy, L. Gutmann, C. Brooks, J. Brick, J. Domico; **Klinikum Dortmund** – G. Reimann (PI), K. Hinrichs, M. Becker, E. Heiss, C. Selle, A. Witteler, S. Al-Boutros, M. J. Danch, A. Ranft, S. Rohde, K. Burg; **Universitätsklinikum Essen** – C. Weimar (PI), V. Zegarac, C. Hartmann, M. Schlamann, S. Göricke, A. Ringlestein, I. Wanke, C. Mönninghoff, M. Dietzold; **Ohio Health Research Institute / Riverside Methodist Hospital** – R. Budzik (PI), T. Davis, G. Eubank, W. J. Hicks, P. Pema, N. Vora, J. Mejilla, M. Taylor; **Oregon Health and Science University** – W. Clark (PI), A. Rontal, J. Fields, B. Peterson, G. Nesbit, H. Lutsep, H. Bozorgchami, R. Priest, O. Ologuntoye, S. Barnwell, A. Dogan, K. Herrick, C. Takahasi, N. Beadell, B. Brown, S. Jamieson; **Cleveland Clinic Cerebrovascular Center** – M. S. Hussain (PI), A. Russman, F. Hui, D. Wisniewski, K. Uchino, Z. Khawaja, I. Katzan, G. Toth, E. Cheng-Ching, M. Bain, S. Man, A. Farrag, P. George, S. John, L. Shankar, A. Drofa, R. Dahlgren, A. Bauer, A. Itreat, A. Taqui, R. Cerejo, A. Richmond; **Universitätsklinikum Heidelberg / Neurologische Klinik und Poliklinik Universitätsklinikum Heidelberg** – P. Ringleb (PI), M. Bendszus, M. Möhlenbruch, T. Reiff, H. Amiri, J. Purucker, C. Herweh, M. Pham, O. Menn, I. Ludwig; **Florida Hospital** – I. Acosta (PI), C. Villar, W. Morgan, C. Sombutmai, F. Hellinger, E. Allen, M. Bellew, R. Gandhi, E. Bonwit, J. Aly; **Maine Medical Center** – R. D. Ecker (PI), D. Seder, J. Morris, M. Skaletsky, J. Belden, C. Baker, L. S. Connolly; **Klinikum Bremen Mitte** –

P. Papanagiotou (PI), C. Roth, A. Kastrup, M. Politi, F. Brunner, M. Alexandrou, H. Merdivan; **Baptist Health Lexington**–C. Ramsey (PI), C. Given II, S. Renfrow; **Providence Brain and Spine Institute**–V.

Deshmukh

(PI), K. Sasadeusz, F. Vincent, JT. Thiesing, J. Putnam, A. Bhatt, A. Kansara, D. Caceves, T. Lowenkopf, L. Yanase, J. Zurasky, S. Dancer, B. Freeman, T. Scheibe □ Mirek, J. Robison, A. Rontal, J. Roll, D. Clark, M. Rodriguez; **Medical College of Wisconsin / Froedtert Hospital West**–B □ FM. Fitzsimmons (PI), O. Zaidat, JR. Lynch, M. Lazzaro, T. Larson, L. Padmore, E. Das, A. Farrow □ Schmidt; **Valley Baptist Medical Center** □ **Harlingen**–A. Hassan (PI), W. Tekle, C. Cate; **Universitätsklinikum Kiel**–O. Jansen (PI), C. Cnyrim, F. Wodarg, C. Wiese, A. Binder, C. Riedel, A. Rohr, N. Lang, H. Laufs, S. Krieter; **Kantonsspital Aarau**–L. Remonda (PI), M. Diepers, J. Añon, K. Nedeltchev, T. Kahles, S. Biethahn, M. Lindner, V. Chang, C. Gächter, C. Esperon, M. Guglielmetti; **Hospital Clinico Universitario de Valladolid**–JF. Arenillas Lara (PI),

M. Martínez Galdámez, AI. Calleja Sanz, E. Cortijo Garcia, P. Garcia Bermejo, S. Perez, P. Mulero Carrillo, E. Crespo Vallejo, M. Ruiz Piñero, L. Lopez Mesonero, FJ. Reyes Muñoz; **Universitätsklinikum Hamburg** □ **Eppendorf**–C. Brekenfeld (PI), J □ H. Buhk, A. Krützelmann, G. Thomalla, B. Cheng, C. Beck, J. Hoppe, E. Goebell, B. Holst, U. Grzyska, G. Wortmann; **UCLA/Ronald Reagan UCLA Medical Center**–S. Starkman (PI), G. Duckwiler, R. Jahan, N. Rao, S. Sheth, K. Ng, A. Noorian, V. Szeder, M. Nour, M. McManus, J. Huang, J. Tarpley, S. Tateshima, N. Gonzalez, L. Ali, D. Liebeskind, J. Hinman, M. Calderon □ Arnulphi, C. Liang, J. Guzy; **University of Miami/Jackson Memorial Hospital**–DR. Yavagal (PI), S. Koch, K. DeSousa,

G. Gordon-Perue, D. Haussen, M. Elhammady, E. Peterson, V. Pandey, S. Dharmadhikari, P. Khandelwal, A. Malik, R. Pafford, P. Gonzalez, K. Ramdas; **Aarhus University Hospital**–G. Andersen, MD (PI), D. Damgaard, P. Von Weitzel □ Mudersbach, C. Simonsen, N. Ruiz de Morales Ayudarte, M. Poulsen, L. Sørensen, S. Karabegovich, M. Hjørringgaard, N. Hjort, T. Harbo, K. Sørensen; **State University of New York Upstate Medical University**–E. Deshaies (PI), D. Padalino, A. Swarnkar, JG. Latorre, E. Elnour, Z. El □ Zammar, M. Villwock; **St. Jude Medical Center**–H. Farid (PI), A. Balgude, L. Cross;

**Rigshospitalet** □ **Copenhagen University Hospital**–K. Hansen (PI), M. Holtmannspötter (Co □ PI),

D. Kondziella, J. Hoejgaard, S. Taudorf, H. Soendergaard, A. Wagner, M. Cronquist, T. Stavngaard, M.

Cortsen, LH. Krarup,

T. Hyldal; Landes - Nervenlinik Wagner-Jauregg-H-P. Haring (PI), S. Guggenberger, M. Hamberger, J.

Trenkler, M. Sonnberger, K. Nussbaumer, C. Dominger, E. Bach; **Hennepin County Medical Center**–BD. Jagadeesan (PI), R. Taylor, J. Kim, K. Shea, R. Tummala, H. Zacharatos, D. Sandhu, M. Ezzeddine, A. Grande, D. Hildebrandt, K. Miller, J. Scherber, A. Hendrickson; **ProMedica Toledo Hospital**–M. Jumaa (PI), S. Zaidi, T. Hendrickson, ~~Y. D. Sn~~ **Universitätsklinikum Christian Doppler Klinik Salzburg**–M. Killer □ Oberpfalzer (PI), J. Mutzenbach, F. Weymayr, E. Broussalis, K. Stadler, A. Jedlitschka; **Tenet Florida Physician Services**–A. Malek (PI), N. Mueller □ Kronast, P. Beck; **Saint Luke's Hospital of Kansas City**–C. Martin (PI), D. Summers, J. Day, I. Bettinger, W. Holloway, K. Olds, S. Arkin, N. Akhtar, C. Boutwell, S. Crandall, M. Schwartzman, C. Weinstein, B. Brion; **Klinikum rechts der Isar □ Technische Universität München**–S. Prothmann (PI), J. Kleine, K. Kreiser, T. Boeckh □ Behrens, H. Poppert, S. Wunderlich, M. L. Koch, V. Biberacher, A. Huberle, G. Gora-Stahlberg, B. Knier, T. Meindl, D. Utpadel-Fischler, ~~M.~~ Ze M. Kowarik, C. Seifert, B. Schwaiger; **University of Massachusetts Medical Center**–A. Puri (PI), S. Hou, A. Wakhloo, M. Moonis, N. Henniger, R. Goddeau, F. Massari, A. Minaeian, JD. Lozano, M. Ramzan, C. Stout, A. Patel, A. Tunguturi, S. Onteddu, R. Carandang, M. Howk

## 1. REVASCAT trial: LIST OF SITES, INVESTIGATORS AND ADMINISTRATIVE STAFF

### **Enrolling Clinical Centers (number recruited):**

**Hospital Vall d'Hebrón (76):** M. Ribó (P.I.), E. Sanjuan, M. Rubiera, J. Pagola, A. Flores, M. Muchada, P. Meler, E. Huerga, S. Gelabert, P. Coscojuela, A. Tomasello, D. Rodriguez, E. Santamarina, O. Maisterra,

S. Boned, L. Seró, A. Rovira, C.A. Molina. **Hospital Germans Trias (47):** M. Millán (P.I.), L. Muñoz, N. Pérez de la Ossa, M. Gomis, L. Lado, E. López-Cancio, E. Palomeras, J. Munuera, P. García Bermejo, S. Remollo, C. Castaño, R. García-Sort, P. Cuadras, P. Puyalto, M. Hernández-Pérez, M. Jiménez, A. Martínez-Piñeiro, G. Lucente, A. Dávalos. **Hospital Clínic (44):** A. Chamorro (co-P.I.), X. Urrea (co-P.I.), V. Obach, A. Cervera, S. Amaro, L. Llull, J. Cudas, M. Balasa, J. Navarro, H. Ariño, A. Aceituno, S. Rudilosso,

A. Renu, J. M. Macho, L. San Roman, J. Blasco, A. López, N. Macías. **Hospital de Bellvitge (39):** P. Cardona (P.I.), H. Quesada, F. Rubio, L. Cano, B. Lara, M. A. de Miquel, L. Aja.

**Steering Committee:** A. Dávalos and T.G. Jovin (co-chairs), A. Chamorro, C. Molina, J. Serena, L. San Román, M.A. de Miquel, A. Rovira and E. Cobo (Statistician).

**Data and Safety Monitoring Board:** G. Albers (chair), K. Lees, J. Arenillas, R. Roberts (Independent Statistician).

**Neuroimaging Corelab:** M. Goyal, A. M. Demchuk, P. Minhas, F. Al-Ajlan, M. Salluzzi, L. Zimmel, S. Patel, M. Eesa

**Angiography Corelab:** R. von Kummer.

**Critical Events Committee:** J. Martí-Fàbregas, B.

**Jankowitz Contract Research Organization:**

Anagram-ESIC, Barcelona **Data Management and**

**Biostatistics:** Bioclever, Barcelona

**Central blinded evaluation of Modified Rankin Scale:** J. Serena, M. Salvat-Plana.

**Trial Coordination Center:** E. López-Cancio, M. Hernandez-Pérez, Hospital Germans Trias I Pujol, Badalona, Barcelona
